# Supplementary material for: Drug–Drug Interactions in Italian Patients with Chronic Hepatitis C Treated with Pangenotypic Direct Acting Agents: Insights from a Real-World Study
Source: MDPI journal article supplement (doi:10.3390/ijerph18137144), 2021-07-03
Supplement: s1 [file s1]

Supplementary material

Supplementary Figure S1. Comparison (#pts) between DAAs based on the risk of DDIs with CNS and CV most common concomitant drugs.

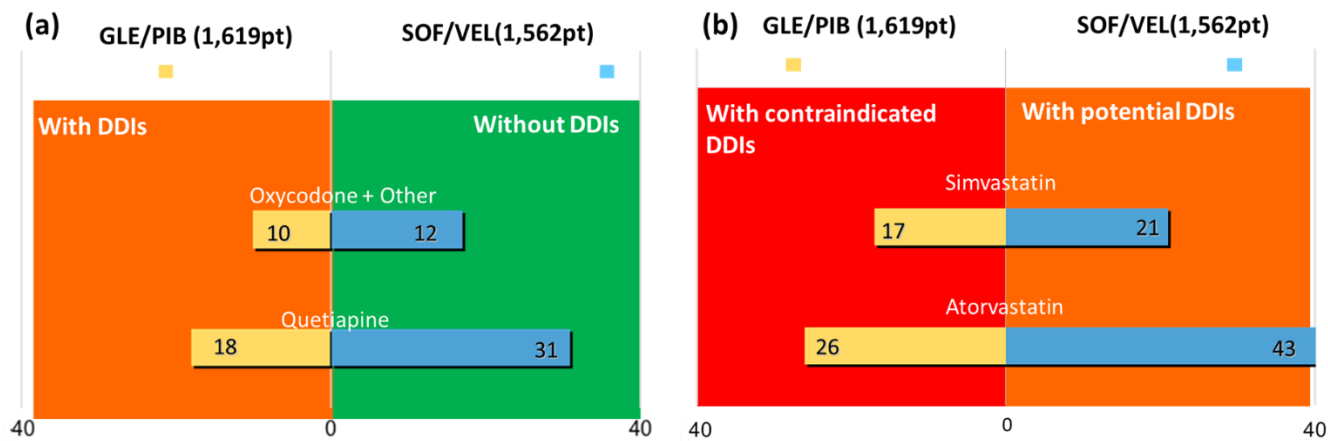

Abbreviations: DDI, drug-drug interaction; GLE/PIB: glecaprevir/pibrentasvir; SOF/VEL: sofosbuvir/velpatasvir.
